# Supplementary material for: STIM1 Controls the Focal Adhesion Dynamics and Cell Migration by Regulating SOCE in Osteosarcoma
Source: MDPI journal article supplement (doi:10.3390/ijms23010162), 2021-12-23
Supplement: s1 [file s1]

## Supplementary information

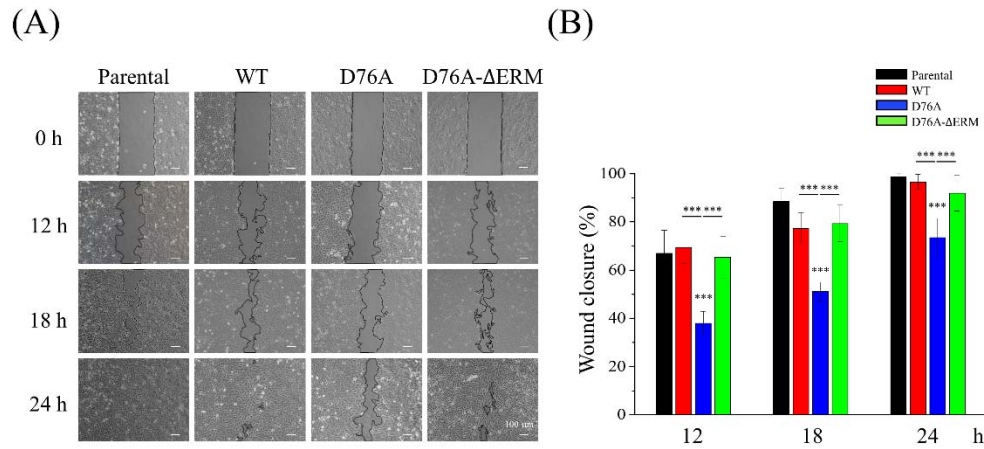

**Figure S1.** Different STIM1 variants result in different migration abilities in osteosarcoma U2OS cells. **(A)** 2D-group cell migration ability was determined using wound healing assays. Phase contrast images of the wound gaps between two monolayer cells were captured at 0, 12, 18 and 24 h. **(B)** Percentage of wound closure was quantified by the following calculations:  $\text{Area}_0 - \text{Area}_t / \text{Area}_0 \times 100\%$ . Bars represent the mean  $\pm$  SEM. \*\*\* $P < 0.001$  by one-way ANOVA.
